# Supplementary material
Source: publisher figshare collection journal article supplement (https://frontiersin.figshare.com/ndownloader/files/22024575)
Supplement: Supplementary file 5 [file 22024575]

# Separate Mock/H1N1 Time to Delivery Analysis on Microarray Data

*Christof Seiler*

3 February 2020

## Contents

|     |                                            |    |
|-----|--------------------------------------------|----|
| 1   | Goal . . . . .                             | 2  |
| 2   | Prerequisites . . . . .                    | 2  |
| 3   | Import Data . . . . .                      | 3  |
| 4   | Preprocessing. . . . .                     | 5  |
| 5   | Data Exploration . . . . .                 | 5  |
| 6   | Differential Expression Analyses . . . . . | 7  |
| 7   | Network Analysis . . . . .                 | 11 |
| 7.1 | Download Gene Network . . . . .            | 11 |
| 7.2 | Find Subgraph . . . . .                    | 12 |
| 7.3 | Visualize Network . . . . .                | 13 |
| 7.4 | Single Genes Expression . . . . .          | 15 |
| 8   | Pathways Analysis . . . . .                | 16 |
| 9   | Time to Delivery Prediction . . . . .      | 18 |
|     | Session Info . . . . .                     | 19 |

# 1 Goal

---

- Load and normalize data using `oligo`
- Differential analysis using `limma`
- Network analysis using `BioNet`
- Pathway analysis using `KEGGREST`

# 2 Prerequisites

---

Install necessary packages from bioconductor repository. Run this code only once to install packages.

```
pkgs_needed = c("oligo", "limma", "affycoretools", "genefilter", "glmnet",
               "hta20transcriptcluster.db", "ggfortify", "magrittr",
               "statmod", "stringr", "tibble", "dplyr",
               "STRINGdb", "BioNet", "DLBCL", "org.Hs.eg.db", "KEGGREST",
               "igraph", "intergraph", "ggnetwork", "ggthemes", "readr")
letsinstall = setdiff(pkgs_needed, installed.packages())
if (length(letsinstall) > 0) {
  source("http://bioconductor.org/biocLite.R")
  biocLite(letsinstall)
}
```

Load packages.

```
library("oligo")
library("limma")
library("affycoretools")
library("genefilter")
library("glmnet")
library("hta20transcriptcluster.db")
library("ggfortify")
library("magrittr")
library("statmod")
library("stringr")
library("tibble")
library("dplyr")
library("STRINGdb")
library("BioNet")
library("DLBCL")
library("org.Hs.eg.db")
library("KEGGREST")
library("igraph")
library("intergraph")
library("ggnetwork")
library("ggthemes")
library("sna")
library("statnet.common")
library("network")
library("readr")
theme_set(theme_few())
```

```
scale_colour_discrete = function(...) scale_colour_few()
```

### 3 Import Data

Then load Affymetrix CEL files. At this stage, Bioconductor will automatically download the necessary annotation packages and install them for us. Add time to delivery variable.

```
sample_table = read.csv("sample_table.csv")
cel_filenames = paste0(as.character(sample_table$array_name), ".CEL")
sample_table %<>% mutate(
  cel_filename = cel_filenames,
  sample_name = paste(sample_table$sample_id,
    sample_table$condition,
    sample_table$treatment, sep = "_")
)
write_csv(sample_table, path = "sample_table_cel.csv")
params$treatment
## [1] "H1N1"
sample_table %<>% filter(treatment == params$treatment)
sample_table$time_to_delivery = sample_table$gestage_enroll -
  sample_table$gestage_delivery
pd = as(sample_table, "AnnotatedDataFrame")
cel_filenames = paste0(as.character(sample_table$array_name), ".CEL")
rawData = read.celfiles(cel_filenames, phenoData = pd,
  sampleNames = sample_table$sample_name)
## Loading required package: pd.hta.2.0
## Loading required package: RSQLite
## Loading required package: DBI
## Platform design info loaded.
## Reading in : Nicholas Bayless_H1N1 1.1_(HTA-2_0).CEL
## Reading in : Nicholas Bayless_H1N1 1.2_(HTA-2_0).CEL
## Reading in : Nicholas Bayless_H1N1 1.3_(HTA-2_0).CEL
## Reading in : Nicholas Bayless_H1N1 2.1_(HTA-2_0).CEL
## Reading in : Nicholas Bayless_H1N1 2.2_(HTA-2_0).CEL
## Reading in : Nicholas Bayless_H1N1 2.3_(HTA-2_0).CEL
## Reading in : Nicholas Bayless_H1N1 3.2_(HTA-2_0).CEL
## Reading in : Nicholas Bayless_H1N1 3.3_(HTA-2_0).CEL
## Reading in : Nicholas Bayless_H1N1 4.3_(HTA-2_0).CEL
## Reading in : Nicholas Bayless_H1N1 5.1_(HTA-2_0).CEL
## Reading in : Nicholas Bayless_H1N1 5.3_(HTA-2_0).CEL
## Reading in : Nicholas Bayless_H1N1 6.1_(HTA-2_0).CEL
## Reading in : Nicholas Bayless_H1N1 6.2_(HTA-2_0).CEL
## Reading in : Nicholas Bayless_H1N1 6.3_(HTA-2_0).CEL
## Reading in : Nicholas Bayless_7.1 +_(HTA-2_0).CEL
## Reading in : Nicholas Bayless_7.2 +_(HTA-2_0).CEL
## Reading in : Nicholas Bayless_7.3 +_(HTA-2_0).CEL
## Reading in : Nicholas Bayless_8.1 +_(HTA-2_0).CEL
## Reading in : Nicholas Bayless_8.2 +_(HTA-2_0).CEL
## Reading in : Nicholas Bayless_8.3 +_(HTA-2_0).CEL
## Reading in : Nicholas Bayless_9.1 +_(HTA-2_0).CEL
```

## Separate Mock/H1N1 Time to Delivery Analysis on Microarray Data

```
## Reading in : Nicholas Bayless_9.2 +_(HTA-2_0).CEL
## Reading in : Nicholas Bayless_9.3 +_(HTA-2_0).CEL
## Reading in : Nicholas Bayless_10.1 +_(HTA-2_0).CEL
## Reading in : Nicholas Bayless_10.2 +_(HTA-2_0).CEL
## Reading in : Nicholas Bayless_10.3 +_(HTA-2_0).CEL
## Reading in : Nicholas Bayless_11.1 +_(HTA-2_0).CEL
## Reading in : Nicholas Bayless_11.2 +_(HTA-2_0).CEL
## Reading in : Nicholas Bayless_11.3 +_(HTA-2_0).CEL
## Reading in : Nicholas Bayless_12.1 +_(HTA-2_0).CEL
## Reading in : Nicholas Bayless_12.2 +_(HTA-2_0).CEL
## Reading in : Nicholas Bayless_H1N1 13.1_(HTA-2_0).CEL
## Reading in : Nicholas Bayless_H1N1 13.2_(HTA-2_0).CEL
## Reading in : Nicholas Bayless_H1N1 13.3_(HTA-2_0).CEL
## Reading in : Nicholas Bayless_H1N1 14.1_(HTA-2_0).CEL
## Reading in : Nicholas Bayless_H1N1 14.2_(HTA-2_0).CEL
## Reading in : Nicholas Bayless_H1N1 14.3_(HTA-2_0).CEL
## Reading in : Nicholas Bayless_H1N1 16.1_(HTA-2_0).CEL
## Reading in : Nicholas Bayless_H1N1 16.2_(HTA-2_0).CEL
## Reading in : Nicholas Bayless_H1N1 16.3_(HTA-2_0).CEL
## Reading in : Nicholas Bayless_H1N1 17.1_(HTA-2_0).CEL
## Reading in : Nicholas Bayless_H1N1 17.2_(HTA-2_0).CEL
## Reading in : Nicholas Bayless_H1N1 17.3_(HTA-2_0).CEL
## Reading in : Nicholas Bayless_H1N1 18.1_(HTA-2_0).CEL
## Reading in : Nicholas Bayless_H1N1 18.3_(HTA-2_0).CEL
## Reading in : Nicholas Bayless_H1N1 19.1_(HTA-2_0).CEL
## Reading in : Nicholas Bayless_H1N1 19.2_(HTA-2_0).CEL
## Reading in : Nicholas Bayless_H1N1 19.3_(HTA-2_0).CEL
## Reading in : Nicholas Bayless_H1N1 20.1_(HTA-2_0).CEL
## Reading in : Nicholas Bayless_H1N1 20.2_(HTA-2_0).CEL
## Reading in : Nicholas Bayless_H1N1 20.3_(HTA-2_0).CEL
## Reading in : Nicholas Bayless_H1N1 21.1_(HTA-2_0).CEL
## Reading in : Nicholas Bayless_H1N1 21.2_(HTA-2_0).CEL
## Reading in : Nicholas Bayless_H1N1 21.3_(HTA-2_0).CEL
## Warning in read.celfiles(cel_filenames, phenoData = pd, sampleNames =
## sample_table$sample_name): 'channel' automatically added to varMetadata in
## phenoData.
rawData
## HTAFeatureSet (storageMode: lockedEnvironment)
## assayData: 6892960 features, 54 samples
## element names: exprs
## protocolData
## rowNames: 1 2 ... 54 (54 total)
## varLabels: exprs dates
## varMetadata: labelDescription channel
## phenoData
## rowNames: 1 2 ... 54 (54 total)
## varLabels: X sample_id ... time_to_delivery (16 total)
## varMetadata: labelDescription channel
## featureData: none
## experimentData: use 'experimentData(object)'
## Annotation: pd.hta.2.0
```

## 4 Preprocessing

Background subtraction, normalization and summarization using median-polish.

```
eset = rma(rawData)
## Background correcting
## Normalizing
## Calculating Expression
```

Get rid of background probes and annotate using functions in `affycoretools` package.

```
dbGetQuery(db(pd.hta.2.0), "select * from type_dict;")
##   type                                     type_id
## 1    1                                           main
## 2    2               Antigenomic background control
## 3    3               control->affx->bac_spike
## 4    4               control->affx->polya_spike
## 5    5 ERCC (External RNA Controls Consortium) step control
## 6    6               Exonic normalization control (Positive Control)
## 7    7               Intronic normalization control (Negative Control)
## 8    8                                           Positive Control
table(getMainProbes("pd.hta.2.0")$type)
##
##      1      2      3      4      5      6      7
## 67516   23     4     4   155   698   646
eset = getMainProbes(eset)
```

Filter probes that we cannot map to symbols.

```
e2s = toTable(hta20transcriptclusterSYMBOL)
prob_ids = rownames(exprs(eset))
keep_ids = which(prob_ids %in% e2s$probe_id)
eset = ExpressionSet(assayData = exprs(eset)[keep_ids,],
                    phenoData = phenoData(eset),
                    experimentData = experimentData(eset),
                    annotation = annotation(eset))
```

Write processed expressions to file for GEO upload.

```
geo_exprs_rma = exprs(eset)
colnames(geo_exprs_rma) = pData(eset)$sample_name
geo_exprs_rma %<>% as_tibble(rownames = "ID_REF")
write_csv(geo_exprs_rma, path = paste0("time_to_delivery_rma_", params$treatment, ".csv"))
```

## 5 Data Exploration

PCA plot of normalized expressions.

```
res_pca = prcomp(t(exprs(eset)), scale. = FALSE)
screeplot(res_pca)
```

## Separate Mock/H1N1 Time to Delivery Analysis on Microarray Data

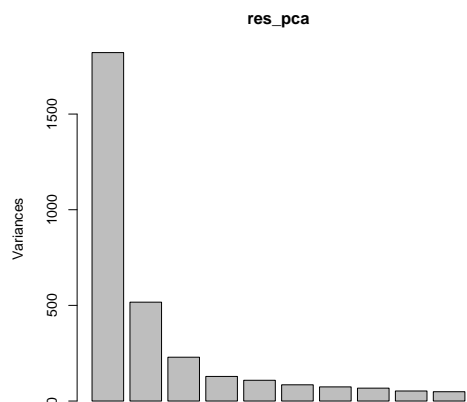

```
sample_table = eset@phenoData@data
asp_ratio = res_pca$sdev[2]^2/res_pca$sdev[1]^2
autoplot(res_pca, data = sample_table, colour = 'treatment',
          shape = 'condition', size = 3, asp = asp_ratio)
```

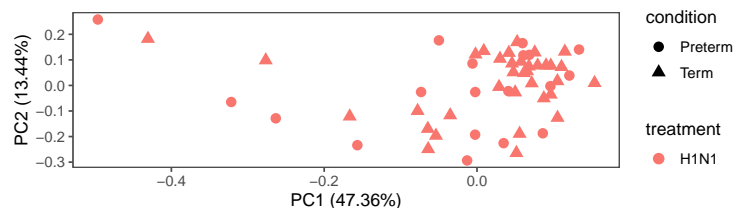

```
rownames(sample_table) = paste(sample_table$sample_id,
                                sample_table$treatment, sep = "_")
autoplot(res_pca, data = sample_table,
          shape = FALSE, label = TRUE, label.size = 3, asp = asp_ratio)
```

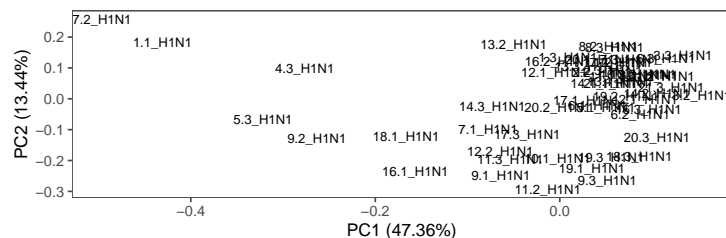

Check for batch effects.

```
sample_table$run_batch %<>% as.factor()
sample_table$run_day %<>% factor(levels(sample_table$run_day)[c(2:5,1,6)])
autoplot(res_pca, data = sample_table, colour = 'run_day',
          shape = 'condition', size = 3, asp = asp_ratio)
```

## Separate Mock/H1N1 Time to Delivery Analysis on Microarray Data

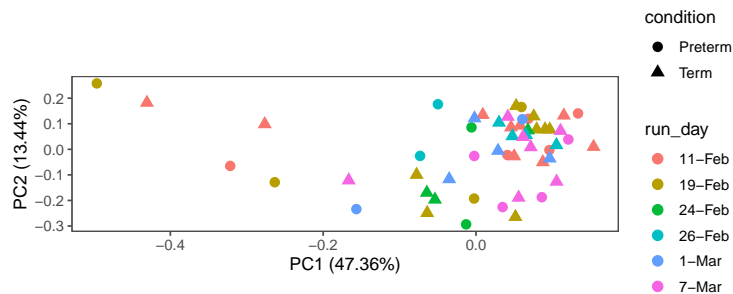

```
autoplot(res_pca, data = sample_table, colour = 'run_batch',
         shape = 'condition', size = 3, asp = asp_ratio)
```

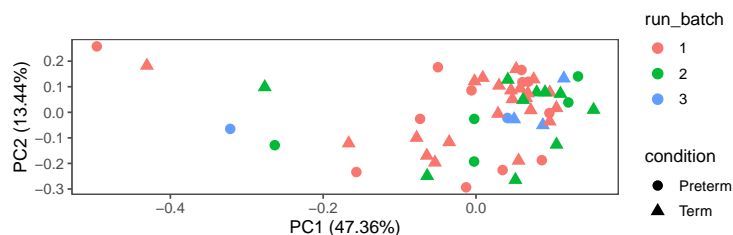

## 6 Differential Expression Analyses

Use `limma` for linear models to assess difference in expression. Define design matrix.

```
design = model.matrix(~ time_to_delivery + gestage_delivery, sample_table)
colnames(design) = str_replace(string = colnames(design),
                              pattern = ":", replacement = "_") %>%
  str_replace(string = ., pattern = "treatment", replacement = "")
colnames(design)
## [1] "(Intercept)" "time_to_delivery" "gestage_delivery"
```

Choose mean expression threshold that maximizes number of differentially expressed genes. This approach is called automatic independent filtering and used in DESeq2.

```
mean_expr = rowMeans(exprs(eset))
thres_candidates = seq(min(mean_expr), quantile(mean_expr, probs = 0.95), 1)
fit_list = lapply(thres_candidates, function(thres) {
  cat("Automatic independent filtering: thres = ", thres, "\n")
  # threshold
  eset_thres = ExpressionSet(assayData = exprs(eset)[mean_expr >= thres,],
                             phenoData = phenoData(eset),
                             experimentData = experimentData(eset),
                             annotation = annotation(eset))

  # fit model
  fit = lmFit(eset_thres, design)
  eBayes(fit)
})
## Automatic independent filtering: thres = 1.349877
## Automatic independent filtering: thres = 2.349877
## Automatic independent filtering: thres = 3.349877
```

## Separate Mock/H1N1 Time to Delivery Analysis on Microarray Data

```
## Automatic independent filtering: thres = 4.349877
## Automatic independent filtering: thres = 5.349877
## Automatic independent filtering: thres = 6.349877
num_sig = sapply(fit_list, function(fit) {
  coeffs = colnames(design)[-1]
  gene_table_combined = lapply(coeffs, function(coeff_name) {
    gene_table = topTable(fit, coef = coeff_name, adjust = "BH",
      number = nrow(fit))
    gene_table %>% dplyr::filter(adj.P.Val < 0.1) %>%
      add_column(coef = coeff_name)
  }) %>% bind_rows()
  nrow(gene_table_combined)
})
num_sig
## [1] 48 80 181 168 9 0
fit = fit_list[[which.max(num_sig)]]
```

Save results in a list of tables.

```
coeffs = colnames(design)[-1]
gene_table_list = lapply(coeffs, function(coeff_name) {
  gene_table = topTable(fit,
    coef = coeff_name,
    adjust = "BH",
    number = nrow(fit))
  hist(gene_table$P.Value, breaks = 100, main = coeff_name)
  gene_table
})
```

**time\_to\_delivery**

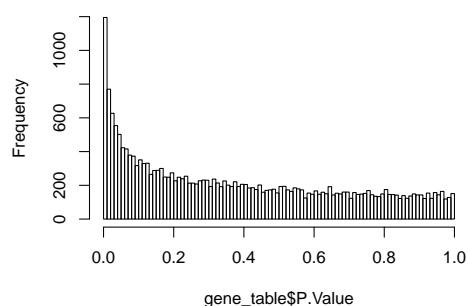

**gestage\_delivery**

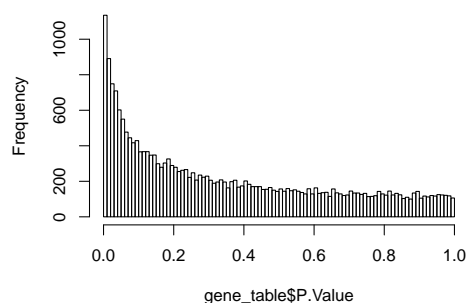



## Separate Mock/H1N1 Time to Delivery Analysis on Microarray Data

```
names(gene_table_list) = coeffs
```

Volcano plots for quality control.

```
for(coeff_name in coeffs) {
  cat(coeff_name, "\n")
  volcanoplot(fit, coef = coeff_name, highlight = 10)
}
## time_to_delivery
```

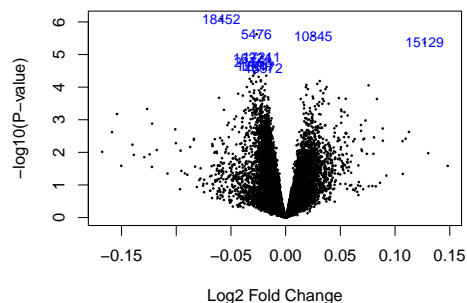

```
## gestage_delivery
```

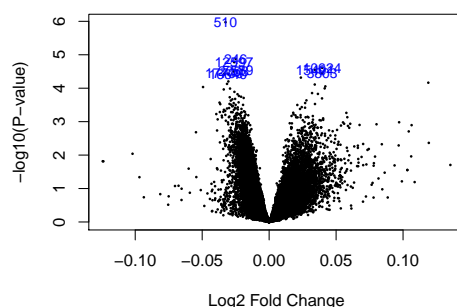

Map between manufacturer identifiers and gene symbols.

```
e2s = toTable(hta20transcriptclusterSYMBOL)
map_gene_symbol = function(gene_table) {
  prob_ids = rownames(gene_table)
  symbol = sapply(prob_ids, function(prob_id) {
    matching_symbol = e2s$symbol[prob_id==e2s$probe_id]
    if(length(matching_symbol)==0) matching_symbol = "No_Symbol_Found"
    matching_symbol
  }) %>% unlist
  gene_table = cbind(gene_table, symbol=symbol, stringsAsFactors=FALSE)
  gene_table
}
gene_table_list = lapply(gene_table_list, map_gene_symbol)
```

Print genes that are below an FDR of 0.1.

```
for(i in 1:length(gene_table_list)) {
  separator = "-----"
  cat(separator, names(gene_table_list)[i], separator, "\n")
}
```

## Separate Mock/H1N1 Time to Delivery Analysis on Microarray Data

```

gene_table_subset = subset(gene_table_list[[i]],adj.P.Val < 0.1)
gene_table_subset %<>% as_tibble()
print(gene_table_subset)
cat(separator,names(gene_table_list)[i],separator,"\n\n")
}
## ----- time_to_delivery -----
## # A tibble: 170 x 7
##   logFC AveExpr      t      P.Value adj.P.Val      B symbol
##   <dbl>   <dbl> <dbl>      <dbl>    <dbl> <dbl> <chr>
## 1 -0.0587   4.87 -5.57 0.000000817   0.0181  5.15 IFNL1
## 2 -0.0265   4.44 -5.28 0.00000239    0.0198  4.10 NEURL1B
## 3  0.0254   4.67  5.24 0.00000268    0.0198  3.99 INPP5A
## 4  0.127    5.67  5.11 0.00000429    0.0238  3.53 SNORD18A
## 5 -0.0220   4.81 -4.83 0.0000117    0.0487  2.55 KRT33A
## 6 -0.0306   5.22 -4.79 0.0000132    0.0487  2.43 PAQR4
## 7 -0.0295   5.59 -4.71 0.0000179    0.0566  2.14 MICB
## 8 -0.0279   5.02 -4.64 0.0000227    0.0583  1.90 RBMS2
## 9 -0.0286   4.68 -4.63 0.0000237    0.0583  1.86 ATP1A4
## 10 -0.0202   5.00 -4.59 0.0000273    0.0605  1.73 GAS6
## # ... with 160 more rows
## ----- time_to_delivery -----
##
## ----- gestage_delivery -----
## # A tibble: 11 x 7
##   logFC AveExpr      t      P.Value adj.P.Val      B symbol
##   <dbl>   <dbl> <dbl>      <dbl>    <dbl> <dbl> <chr>
## 1 -0.0326   4.77 -5.50 0.00000106   0.0236  4.98 LSP1P5
## 2 -0.0250   4.86 -4.79 0.0000133   0.0821  2.51 TFAP2E
## 3 -0.0261   3.75 -4.73 0.0000167   0.0821  2.29 PRG2
## 4  0.0396   5.20  4.61 0.0000246   0.0821  1.92 MAPK8
## 5  0.0344   6.15  4.57 0.0000283   0.0821  1.78 KCTD5
## 6 -0.0202   5.32 -4.57 0.0000287   0.0821  1.77 MTX1
## 7 -0.0265   6.06 -4.54 0.0000316   0.0821  1.68 BOLA1
## 8  0.0396   4.45  4.51 0.0000350   0.0821  1.58 PRKCI
## 9 -0.0334   4.46 -4.50 0.0000368   0.0821  1.53 ETV4
## 10 -0.0307   3.83 -4.50 0.0000370   0.0821  1.52 FNDC8
## 11  0.0237   4.67  4.42 0.0000482   0.0971  1.27 INPP5A
## ----- gestage_delivery -----

```

Write to text file.

```

for(i in 1:length(gene_table_list)) {
  file_name_processed = paste0(
    "time_to_delivery-",
    names(gene_table_list)[i],
    "-",
    params$treatment,
    ".csv"
  )
  cat("writting:", file_name_processed, "\n")
  gene_table_list[[i]] %>%

```

## Separate Mock/H1N1 Time to Delivery Analysis on Microarray Data

```
as_tibble() %>%
write_csv(path = file_name_processed)
}
## writting: time_to_delivery_time_to_delivery_H1N1.csv
## writting: time_to_delivery_gestage_delivery_H1N1.csv
```

## 7 Network Analysis

Network analysis on time to event table.

```
gene_table = gene_table_list[[1]]
```

### 7.1 Download Gene Network

Download proteins for human species (code is 9606). Consider interactions at 0.9 confidence. From the STRING website: "In STRING, each protein-protein interaction is annotated with one or more 'scores'. Importantly, these scores do not indicate the strength or the specificity of the interaction. Instead, they are indicators of confidence, i.e. how likely STRING judges an interaction to be true, given the available evidence. All scores rank from 0 to 1, with 1 being the highest possible confidence. A score of 0.5 would indicate that roughly every second interaction might be erroneous (i.e., a false positive)."

```
string_db = STRINGdb$new(version="10", species = 9606,
                          score_threshold = 900, input_directory = "")
```

Check how many proteins are in the database.

```
string_proteins = string_db$get_proteins()
dim(string_proteins)
## [1] 20457      4
```

Map gene names to identifiers used in the database.

```
mapped = string_db$map(gene_table, "symbol", removeUnmappedRows = TRUE)
## Warning: we couldn't map to STRING 20% of your identifiers
interactions = string_db$get_interactions(mapped$STRING_id)
interactions = data.frame(from = interactions$from,
                          to = interactions$to,
                          combined_score = interactions$combined_score)

dim(interactions)
## [1] 113416      3
head(interactions)
##           from           to combined_score
## 1 9606.ENSP00000003084 9606.ENSP00000302234          902
## 2 9606.ENSP00000003084 9606.ENSP00000302961          979
## 3 9606.ENSP00000003084 9606.ENSP00000305372          927
## 4 9606.ENSP00000003084 9606.ENSP00000308236          919
## 5 9606.ENSP00000003084 9606.ENSP00000308541          935
## 6 9606.ENSP00000003084 9606.ENSP00000309591          961
```

### 7.2 Find Subgraph

Fit a Beta-Uniform model.

```
pval = mapped$P.Value
names(pval) = mapped$STRING_id
fb = fitBumModel(pval)
## Warning in bumOptim(x = x, starts): One or both parameters are on the limit
## of the defined parameter space
```

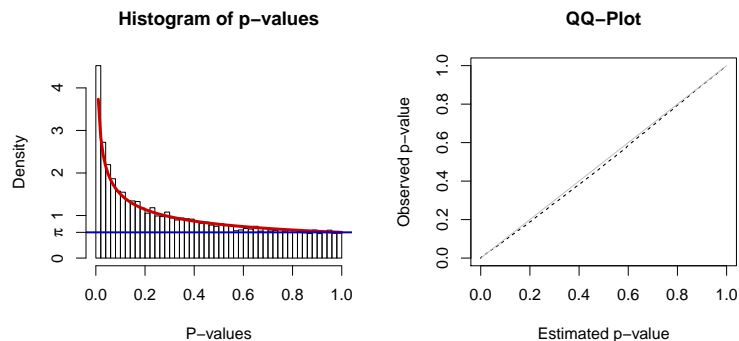

```
fb
## Beta-Uniform-Mixture (BUM) model
##
## 17532 pvalues fitted
##
## Mixture parameter (lambda): 0.000
## shape parameter (a): 0.605
## log-likelihood: 2640.5
```

Set the `fdr` parameter which can be interpreted as the FDR of the subgraph. Smaller values will produce a smaller maximum subgraph. You should try a few values (e.g. 0.05, 0.01, 0.001) to obtain a reasonable small subgraph that permits biological interpretation. First, we convert the interaction table into an `igraph` object and make the nodes names human readable. Then we search for the optimal subgraph.

```
fdr_vec = seq(0.1, 0.01, -0.01)
network = graph_from_data_frame(interactions)
module_list = mclapply(fdr_vec, function(fdr) {
  scores = scoreNodes(network, fb, fdr = fdr)
  module = runFastHeinz(network, scores)
  module
}, mc.cores = 4)
module_lengths = sapply(module_list, function(module) length(V(module)))
tb_module = tibble(id = 1:length(module_lengths),
  num_nodes = module_lengths,
  fdr = fdr_vec)
ggplot(tb_module, aes(fdr, num_nodes)) +
  geom_line() +
  geom_point(size = 2)
```

## Separate Mock/H1N1 Time to Delivery Analysis on Microarray Data

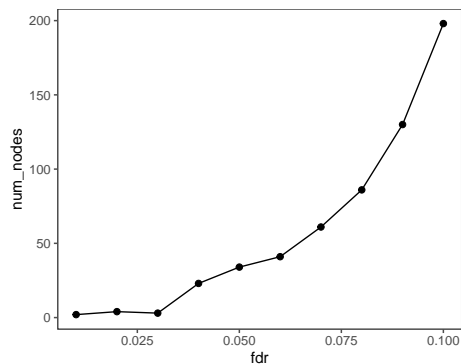

```
model_sel = tb_module %>% filter(fdr == 0.05) %>% .$id
module = module_list[[model_sel]]
module
## IGRAPH 381b5e6 DN-- 34 55 --
## + attr: name (v/c), score (v/n), combined_score (e/n)
## + edges from 381b5e6 (vertex names):
## [1] 9606.ENSPO0000007722->9606.ENSPO00000371067
## [2] 9606.ENSPO00000219070->9606.ENSPO00000219271
## [3] 9606.ENSPO00000219070->9606.ENSPO00000350941
## [4] 9606.ENSPO00000219070->9606.ENSPO00000353483
## [5] 9606.ENSPO00000219070->9606.ENSPO00000380334
## [6] 9606.ENSPO00000229135->9606.ENSPO00000270139
## [7] 9606.ENSPO00000229135->9606.ENSPO00000349365
## [8] 9606.ENSPO00000229135->9606.ENSPO00000369553
## + ... omitted several edges
```

### 7.3 Visualize Network

Differential expression is coloured in red (upregulated), green (downregulated), and white (neutral). Shapes represent scores: rectangles are negative and circles are positive.

**Note that in limma, for continuous predictors, the log-fold changes (log-fc) are the regression coefficients.**

```
plot_network = function(color_name) {
  if(length(V(module)) < 2)
    return("need two or more nodes")
  set.seed(0xdada)
  module_df = ggnetwork(module, layout = "kamadakawai")
  module_df$x = c(module_df$x)
  module_df$y = c(module_df$y)
  module_df$xend = c(module_df$xend)
  module_df$yend = c(module_df$yend)
  module_df %<>% mutate(sign_score = factor(sign(module_df$score)))
  ids = sapply(module_df$vertex.names,
    function(id) which(id == mapped$STRING_id)[1])
  module_df %<>% mutate(t_statistic = mapped$t[ids])
  module_df %<>% mutate(coefficient = mapped$logFC[ids])
  module_df %<>% mutate(symbol = mapped$symbol[ids])
}
```

## Separate Mock/H1N1 Time to Delivery Analysis on Microarray Data

```
ggplot(module_df, aes(x = x, y = y, xend = xend, yend = yend)) +
  geom_edges() +
  geom_nodelabel_repel(aes(label = symbol),
    box.padding = unit(1, "lines"),
    alpha = 0.3) +
  geom_nodes(aes_string(shape = "sign_score", color = color_name),
    size = 6) +
  ggtitle(paste0("Time to Delivery (FDR = ", fdr_vec[model_sel], ")")) +
  scale_color_gradient2(midpoint = 0, low = "blue", mid = "white",
    high = "red", space = "Lab") +
  theme_blank()
}
set.seed(0xdada)
network_t_statistic = plot_network("t_statistic")
save(network_t_statistic,
  file = paste0("network_t_statistic_", params$treatment, ".Rdata"))
network_t_statistic
```

Time to Delivery (FDR = 0.05)

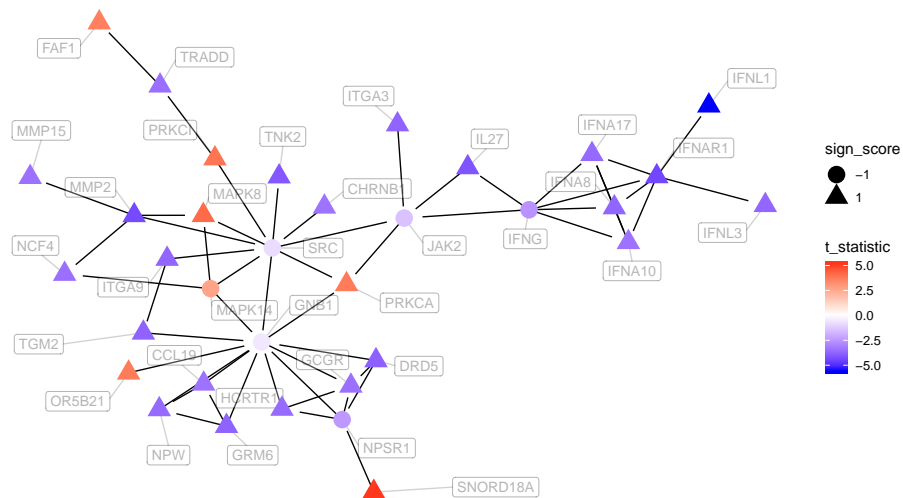

```
network_log_coefficient = plot_network("coefficient")
save(network_log_coefficient,
  file = paste0("network_log_coefficient_", params$treatment, ".Rdata"))
network_log_coefficient
```

## Separate Mock/H1N1 Time to Delivery Analysis on Microarray Data

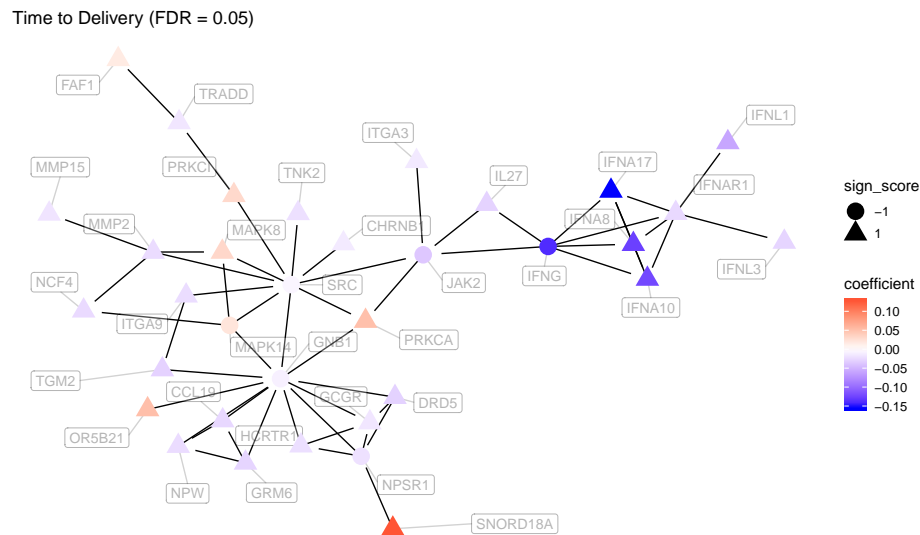

## 7.4 Single Genes Expression

Scatter plot for some genes in the network.

```
plot_node = function(gene_name) {
  probe_id = e2s[which(e2s$symbol == gene_name), "probe_id"]
  tb_expr = tibble(
    expr = exprs(eset)[which(rownames(exprs(eset)) == probe_id),],
    time_to_delivery = pData(eset)$time_to_delivery,
    gestage_delivery = pData(eset)$gestage_delivery
  )
  fit_expr = lm(expr ~ gestage_delivery, tb_expr)
  fit_time = lm(time_to_delivery ~ gestage_delivery, tb_expr)
  tb_expr %<>% mutate(res_expr = residuals(fit_expr))
  tb_expr %<>% mutate(res_time_to_delivery = residuals(fit_time))
  ggplot(tb_expr, aes(res_time_to_delivery, res_expr)) +
    geom_smooth(method = lm, se = FALSE, color = "grey", size = 2) +
    geom_point(size = 2) +
    ggtitle(gene_name) +
    xlab("resid(lm(time_to_delivery ~ gestage_delivery))") +
    ylab("resid(lm(expr ~ gestage_delivery))")
}
plot_node("IFNL1")
```

## Separate Mock/H1N1 Time to Delivery Analysis on Microarray Data

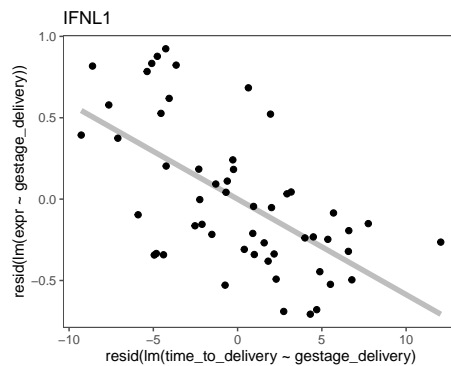

```
plot_node("SNORD18A")
```

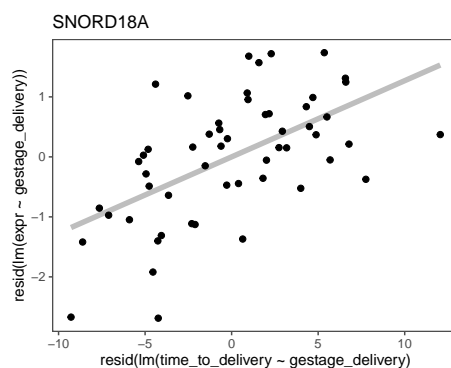

## 8 Pathways Analysis

Calculate number of genes that our network on known pathways have in common. Only keep pathways that overlap at least 5% of genes. Visualize pathway overlap.

```
plot_pathway = function(module) {  
  if(length(V(module)) < 2)  
    return("need two or more nodes")  
  
  # get human pathways form kegg database  
  pathways = keggList("pathway", "hsa")  
  human_pathways = sub("path:", "", names(pathways))  
  
  # kegg server only allow 10 request at the time  
  n_request = ceiling(length(human_pathways)/10)  
  chunk = function(x, n) split(x, sort(rank(x) %% n))  
  chunks_pathways = chunk(1:length(human_pathways), n_request)  
  
  # download from kegg server  
  list_chunk_pathways = lapply(chunks_pathways,   
                                function(one_chunk_pathways) {  
      cat("download chunk:", one_chunk_pathways, "\n")  
      pathway_ids = human_pathways[one_chunk_pathways]  
      setNames(keggGet(pathway_ids), pathway_ids)  
    })  
}
```



## Separate Mock/H1N1 Time to Delivery Analysis on Microarray Data

```
# flatten list of lists
all_pathways = unlist(list_chunk_pathways, recursive=FALSE)

# check for all human pathways
module_df = ggnetwork(module)
ids = sapply(module_df$vertex.names,
             function(id) which(id == mapped$STRING_id)[1])
tb_pways = lapply(all_pathways, function(pway) {
  gene_desc = pway$GENE[c(F,T)]
  if(length(gene_desc) > 0) {
    gene_symbol = sapply(strsplit(gene_desc, split = ";"),
                        function(desc) desc[1])
    overlap = mean(gene_symbol %in% unique(mapped$symbol[ids]))
  } else {
    overlap = 0
  }
  tibble(
    name = pway$NAME,
    overlap = overlap
  )
}) %>% bind_rows
tb_pways %<>%
  dplyr::filter(overlap > 0.04) %>%
  dplyr::arrange(desc(overlap))
tb_pways$name %<>% str_replace(" - Homo sapiens \\(human\\)", "")
tb_pways$name %<>% factor(levels = rev(tb_pways$name))
ggplot(tb_pways, aes(x = 100*overlap, y = name)) +
  geom_point(size = 2) +
  theme(legend.position="none") +
  xlab("Overlap in %") +
  ylab("Pathway Name")
}

plot_pathway(module)

## download chunk: 1 2 3 4 5 6 7 8 9
## download chunk: 10 11 12 13 14 15 16 17 18 19
## download chunk: 20 21 22 23 24 25 26 27 28 29
## download chunk: 30 31 32 33 34 35 36 37 38 39
## download chunk: 40 41 42 43 44 45 46 47 48 49
## download chunk: 50 51 52 53 54 55 56 57 58 59
## download chunk: 60 61 62 63 64 65 66 67 68 69
## download chunk: 70 71 72 73 74 75 76 77 78 79
## download chunk: 80 81 82 83 84 85 86 87 88 89
## download chunk: 90 91 92 93 94 95 96 97 98 99
## download chunk: 100 101 102 103 104 105 106 107 108 109
## download chunk: 110 111 112 113 114 115 116 117 118 119
## download chunk: 120 121 122 123 124 125 126 127 128 129
## download chunk: 130 131 132 133 134 135 136 137 138 139
## download chunk: 140 141 142 143 144 145 146 147 148 149
## download chunk: 150 151 152 153 154 155 156 157 158 159
## download chunk: 160 161 162 163 164 165 166 167 168 169
```

## Separate Mock/H1N1 Time to Delivery Analysis on Microarray Data

```
## download chunk: 170 171 172 173 174 175 176 177 178 179
## download chunk: 180 181 182 183 184 185 186 187 188 189
## download chunk: 190 191 192 193 194 195 196 197 198 199
## download chunk: 200 201 202 203 204 205 206 207 208 209
## download chunk: 210 211 212 213 214 215 216 217 218 219
## download chunk: 220 221 222 223 224 225 226 227 228 229
## download chunk: 230 231 232 233 234 235 236 237 238 239
## download chunk: 240 241 242 243 244 245 246 247 248 249
## download chunk: 250 251 252 253 254 255 256 257 258 259
## download chunk: 260 261 262 263 264 265 266 267 268 269
## download chunk: 270 271 272 273 274 275 276 277 278 279
## download chunk: 280 281 282 283 284 285 286 287 288 289
## download chunk: 290 291 292 293 294 295 296 297 298 299
## download chunk: 300 301 302 303 304 305 306 307 308 309
## download chunk: 310 311 312 313 314 315 316 317 318 319
## download chunk: 320 321 322 323 324 325 326 327 328
## download chunk: 329 330 331 332 333 334 335 336 337
```

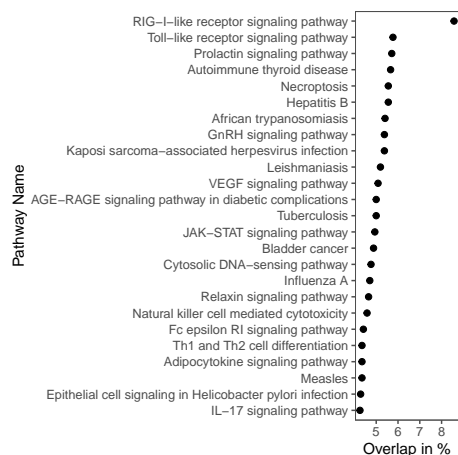

## 9 Time to Delivery Prediction

Use Lasso to predict time to delivery from gene expressions.

```
set.seed(0xdada)
exprs_table = t(exprs(eset))
sample_table = eset@phenoData@data
glmnet_cv = cv.glmnet(x = exprs_table,
                      y = sample_table$time_to_delivery)
plot(glmnet_cv)
```

## Separate Mock/H1N1 Time to Delivery Analysis on Microarray Data

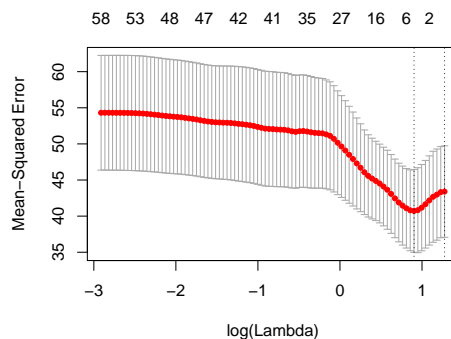

```
glmnet_fit = glmnet(x = exprs_table,
                    y = sample_table$time_to_delivery,
                    lambda = glmnet_cv$lambda.min)
nonzero = which(coef(glmnet_fit) > 0)
prob_ids_nonzero = rownames(coef(glmnet_fit))[nonzero]
e2s[which(e2s$probe_id %in% prob_ids_nonzero),]
##           probe_id symbol
## 6306 TC04000513.hg.1 MIR3684
```

## Session Info

```
sessionInfo()
## R version 3.5.1 (2018-07-02)
## Platform: x86_64-apple-darwin15.6.0 (64-bit)
## Running under: macOS 10.15.3
##
## Matrix products: default
## BLAS: /Library/Frameworks/R.framework/Versions/3.5/Resources/lib/libRblas.0.dylib
## LAPACK: /Library/Frameworks/R.framework/Versions/3.5/Resources/lib/libRlapack.dylib
##
## locale:
## [1] en_US.UTF-8/en_US.UTF-8/en_US.UTF-8/C/en_US.UTF-8/en_US.UTF-8
##
## attached base packages:
## [1] stats4    parallel  stats      graphics  grDevices  utils      datasets
## [8] methods   base
##
## other attached packages:
##  [1] pd.hta.2.0_3.12.2          DBI_1.0.0
##  [3] RSQLite_2.1.1              readr_1.3.1
##  [5] sna_2.4                    network_1.15
##  [7] statnet.common_4.2.0       ggthemes_4.1.1
##  [9] ggnetwork_0.5.1            intergraph_2.0-2
## [11] igraph_1.2.4.1             KEGGREST_1.22.0
## [13] DLBCL_1.22.0               BioNet_1.42.0
## [15] RBGL_1.58.2                graph_1.60.0
## [17] STRINGdb_1.22.0           dplyr_0.8.3
## [19] tibble_2.1.3              stringr_1.4.0
```

## Separate Mock/H1N1 Time to Delivery Analysis on Microarray Data

```
## [21] statmod_1.4.32          magrittr_1.5
## [23] ggfortify_0.4.7         ggplot2_3.2.1
## [25] hta20transcriptcluster.db_8.7.0 org.Hs.eg.db_3.7.0
## [27] AnnotationDbi_1.44.0    glmnet_2.0-18
## [29] foreach_1.4.4          Matrix_1.2-17
## [31] genefilter_1.64.0       affycoretools_1.54.0
## [33] limma_3.38.3            oligo_1.46.0
## [35] Biostrings_2.50.2       XVector_0.22.0
## [37] IRanges_2.16.0         S4Vectors_0.20.1
## [39] Biobase_2.42.0         oligoClasses_1.44.0
## [41] BiocGenerics_0.28.0     BiocStyle_2.10.0
##
## loaded via a namespace (and not attached):
## [1] utf8_1.1.4              proto_1.0.0
## [3] R.utils_2.8.0           tidyselect_0.2.5
## [5] htmlwidgets_1.3         grid_3.5.1
## [7] BiocParallel_1.16.6     munsell_0.5.0
## [9] codetools_0.2-16       preprocessCore_1.44.0
## [11] chron_2.3-53            withr_2.1.2
## [13] colorspace_1.4-1        Category_2.48.1
## [15] OrganismDbi_1.24.0      knitr_1.22
## [17] rstudioapi_0.10         labeling_0.3
## [19] GenomeInfoDbData_1.2.0  hwriter_1.3.2
## [21] farver_2.0.1            bit64_0.9-7
## [23] coda_0.19-3             vctrs_0.2.1
## [25] xfun_0.6                biovizBase_1.30.1
## [27] affxparser_1.54.0       R6_2.4.1
## [29] GenomeInfoDb_1.18.2     locfit_1.5-9.1
## [31] AnnotationFilter_1.6.0  bitops_1.0-6
## [33] reshape_0.8.8           DelayedArray_0.8.0
## [35] assertthat_0.2.1        scales_1.1.0
## [37] nnet_7.3-12             gtable_0.3.0
## [39] affy_1.60.0             ggbio_1.30.0
## [41] ensemblDb_2.6.8         rlang_0.4.2
## [43] zeallot_0.1.0           splines_3.5.1
## [45] rtracklayer_1.42.2      lazyeval_0.2.2
## [47] acepack_1.4.1           dichromat_2.0-0
## [49] checkmate_1.9.4         BiocManager_1.30.4
## [51] yaml_2.2.0              reshape2_1.4.3
## [53] GenomicFeatures_1.34.8  backports_1.1.5
## [55] Hmisc_4.2-0            tools_3.5.1
## [57] bookdown_0.9           affyio_1.52.0
## [59] gplots_3.0.1.1         ff_2.2-14
## [61] RColorBrewer_1.1-2      gsubfn_0.7
## [63] Rcpp_1.0.3             hash_2.2.6.1
## [65] plyr_1.8.5             base64enc_0.1-3
## [67] progress_1.2.2          zlibbioc_1.28.0
## [69] purrr_0.3.3            RCurl_1.95-4.12
## [71] prettyunits_1.1.0       rpart_4.1-15
## [73] sqldf_0.4-11           ggrepel_0.8.1
## [75] SummarizedExperiment_1.12.0 cluster_2.0.9
```

## Separate Mock/H1N1 Time to Delivery Analysis on Microarray Data

```
## [77] data.table_1.12.6      ProtGenerics_1.14.0
## [79] matrixStats_0.55.0     hms_0.5.2
## [81] evaluate_0.13          xtable_1.8-4
## [83] XML_3.98-1.19          gcrma_2.54.0
## [85] gridExtra_2.3          compiler_3.5.1
## [87] biomaRt_2.38.0         KernSmooth_2.23-15
## [89] crayon_1.3.4           ReportingTools_2.22.1
## [91] R.oo_1.22.0            htmltools_0.3.6
## [93] GOstats_2.48.0         Formula_1.2-3
## [95] tidyr_1.0.0            geneplotter_1.60.0
## [97] cli_2.0.1              R.methodsS3_1.7.1
## [99] gdata_2.18.0           GenomicRanges_1.34.0
## [101] pkgconfig_2.0.3        GenomicAlignments_1.18.1
## [103] foreign_0.8-71         annotate_1.60.1
## [105] AnnotationForge_1.24.0 VariantAnnotation_1.28.13
## [107] digest_0.6.23          rmarkdown_1.12
## [109] htmlTable_1.13.2       edgeR_3.24.3
## [111] GSEABase_1.44.0        curl_4.3
## [113] Rsamtools_1.34.1       gtools_3.8.1
## [115] lifecycle_0.1.0        PFAM.db_3.7.0
## [117] fansi_0.4.1            BSgenome_1.50.0
## [119] pillar_1.4.3           lattice_0.20-38
## [121] GGally_1.4.0           httr_1.4.0
## [123] plotrix_3.7-5          survival_2.44-1.1
## [125] GO.db_3.7.0            glue_1.3.1
## [127] png_0.1-7              iterators_1.0.10
## [129] bit_1.1-14            Rgraphviz_2.26.0
## [131] stringi_1.4.5          blob_1.1.1
## [133] DESeq2_1.22.2          latticeExtra_0.6-28
## [135] caTools_1.17.1.2       memoise_1.1.0
```
