# Supplementary material
Source: publisher figshare collection journal article supplement (https://frontiersin.figshare.com/ndownloader/files/22024575)
Supplement: Supplementary file 8 [file 22024575]

# Case-Control with Gestational Age Matching

*Christof Seiler*

12 February 2020

## Contents

|    |                                            |    |
|----|--------------------------------------------|----|
| 1  | Goal . . . . .                             | 2  |
| 2  | Prerequisites . . . . .                    | 2  |
| 3  | Import Data . . . . .                      | 2  |
| 4  | Quality Control . . . . .                  | 7  |
| 5  | Preprocessing. . . . .                     | 8  |
| 6  | Data Exploration . . . . .                 | 9  |
| 7  | Differential Expression Analyses . . . . . | 11 |
| 8  | Patient Variability . . . . .              | 15 |
| 9  | Power Analysis . . . . .                   | 18 |
| 10 | Gene Set Enrichment Analysis . . . . .     | 20 |
|    | Session Info . . . . .                     | 20 |

### 1 Goal

---

1. Load and normalize data using `oligo`
2. Differential analysis using `limma`

### 2 Prerequisites

---

Install necessary packages from bioconductor repository. Run this code only once to install packages.

```
pkgs_needed = c("oligo", "limma", "hta20transcriptcluster.db", "pd.hta.2.0",
  "affycoretools", "genefilter", "MatchIt", "optmatch", "ggfortify",
  "magrittr", "statmod", "readr", "dplyr", "readxl", "stringr",
  "tibble", "ggrepel", "tidyr", "locfdr")
letsinstall = setdiff(pkgs_needed, installed.packages())
if (length(letsinstall) > 0) {
  source("http://bioconductor.org/biocLite.R")
  biocLite(letsinstall)
}
```

Load packages.

```
library("oligo")
library("limma")
library("hta20transcriptcluster.db")
library("affycoretools")
library("genefilter")
library("MatchIt")
library("ggfortify")
library("magrittr")
library("statmod")
library("readr")
library("dplyr")
library("readxl")
library("stringr")
library("tibble")
library("ggrepel")
library("tidyr")
library("locfdr")
```

### 3 Import Data

---

Read sample tables. Merge with sample information table.

```
sample_table = read_csv("sample_table_from_word.csv")
## Parsed with column specification:
## cols(
##   ptidno = col_double(),
##   visitcode = col_double(),
##   gestage_delivery = col_double(),
```

## Case-Control with Gestational Age Matching

```
## gestage_pbmc_collected = col_double(),
## ptb_case = col_character(),
## ptb_casenum = col_double(),
## ptb_controlnum = col_double()
## )
new_matched = read_excel("MSS Case-Control Matches (Masked)_new_matched.xlsx")
sample_table %<>% dplyr::left_join(new_matched, by = "ptidno",
                                suffix = c("", "2"))
ggplot(sample_table, aes(as.factor(ptb_casenum), gestage_pbmc_collected,
                        color = ptb_case)) +
  geom_jitter(position=position_dodge(width = 0.5), size = 2) +
  xlab("matched pair id")
```

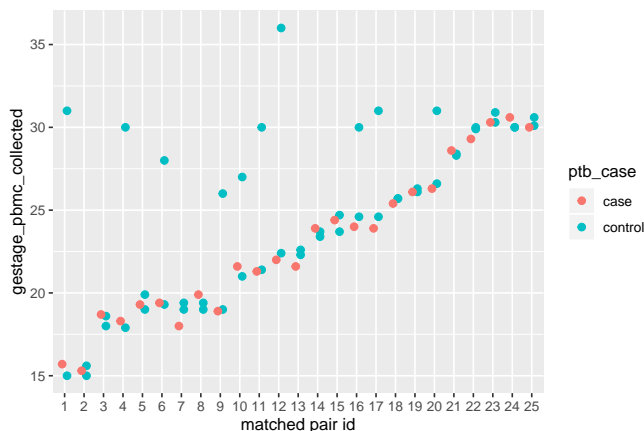

```
sample_table %<>% dplyr::select(ptidno,
                              ptb_case,
                              gestage_pbmc_collected,
                              gestage_delivery,
                              sample_id = SampleID)
```

Find CEL files in current folder.

```
file_names_cel = list.files("./", pattern = "CEL")
params$treatment
## [1] "unstim"
if(params$treatment == "stim") {
  file_names_cel = file_names_cel[str_detect(
    string = file_names_cel,
    pattern = "Bayless_H1N1|\\+\\-\\(HTA)"]
} else {
  file_names_cel = file_names_cel[str_detect(
    string = file_names_cel,
    pattern = "Bayless_US|\\-\\-\\(HTA|\\-\\-\\(HTA|\\-\\-\\(HTA)"]
}
tb_file_name = lapply(sample_table$sample_id, function(id) {
  pattern = paste0("[ _]", id)
  name = file_names_cel[which(str_detect(file_names_cel, pattern))]
  if(length(name)==0) name = NA
})
```

## Case-Control with Gestational Age Matching

```
tibble(sample_id = id, file_name = name)
}) %>% bind_rows()
sample_table %<>% dplyr::left_join(tb_file_name, by = "sample_id")
sample_table %<>% na.omit
table(sample_table$ptb_case)
##
##      case control
##      20      38
```

Match samples.

```
set.seed(0xdada2)
sample_table$group = sample_table$ptb_case == "case"
mout = matchit(group ~ gestage_pbmc_collected,
               data = sample_table,
               method = "optimal",
               ratio = 1)
## Warning in optmatch::fullmatch(d, min.controls = ratio, max.controls = ratio, : Without 'data' argument t
##      to be the same as your original data.
summary(mout)
##
## Call:
## matchit(formula = group ~ gestage_pbmc_collected, data = sample_table,
##      method = "optimal", ratio = 1)
##
## Summary of balance for all data:
##               Means Treated Means Control SD Control Mean Diff
## distance                0.3752         0.3288    0.1148    0.0464
## gestage_pbmc_collected   21.4100        23.6605    5.2473   -2.2505
##               eQQ Med eQQ Mean eQQ Max
## distance                0.0586    0.0525  0.1042
## gestage_pbmc_collected  1.8000    2.2350  7.4000
##
##
## Summary of balance for matched data:
##               Means Treated Means Control SD Control Mean Diff
## distance                0.3752         0.3753    0.0887   -1e-04
## gestage_pbmc_collected   21.4100        21.4100    3.6864    0e+00
##               eQQ Med eQQ Mean eQQ Max
## distance                0.0041    0.0055  0.017
## gestage_pbmc_collected  0.2000    0.2300  0.700
##
## Percent Balance Improvement:
##               Mean Diff. eQQ Med eQQ Mean eQQ Max
## distance                99.7989 93.0472 89.6035 83.7009
## gestage_pbmc_collected 100.0000 88.8889 89.7092 90.5405
##
## Sample sizes:
##               Control Treated
## All                38      20
## Matched            20      20
```

## Case-Control with Gestational Age Matching

```
## Unmatched      18      0
## Discarded      0      0
sample_table$pair = NA
A = rownames(mout$match.matrix) %>% as.integer
B = mout$match.matrix %>% as.integer
for(i in 1:nrow(mout$match.matrix)) {
  sample_table$pair[A[i]] = i
  sample_table$pair[B[i]] = i
}
sample_table %<>% dplyr::select(-group)
sample_table %<>% na.omit
sample_table %>%
  dplyr::select(sample_id,ptidno,pair,ptb_case,gestage_pbmc_collected,
                gestage_delivery) %>%
  arrange(pair,ptb_case) %>%
  print(n = Inf)
## # A tibble: 40 x 6
##   sample_id ptidno pair ptb_case gestage_pbmc_collected gestage_delivery
##   <chr>      <dbl> <int> <chr>          <dbl>          <dbl>
## 1 1.2      14104760     1 case           15.7           21.3
## 2 2.2      14104580     1 control        15.6           37.4
## 3 2.1      14101980     2 case           15.3           33.6
## 4 2.3      14105160     2 control        15           39.3
## 5 3.3      14225030     3 case           18.7           33.4
## 6 3.2      14223910     3 control        18.6           38
## 7 4.2      14100420     4 case           18.3           33
## 8 3.1      14105820     4 control        18            38
## 9 5.3      14222170     5 case           19.3           30.9
## 10 6.3      14223900     5 control        19.3           39
## 11 6.1      14220060     6 case           19.4           29.6
## 12 8.1      14104890     6 control        19.4           41
## 13 7.2      14100460     7 case           18            32.9
## 14 4.3      14102700     7 control        17.9           40
## 15 8.3      14224240     8 case           19.9           23
## 16 5.2      14103060     8 control        19.9           42.3
## 17 9.2      14102840     9 case           18.9           24.1
## 18 9.1      14102770     9 control        19            38.3
## 19 10.1      14223520    10 case           21.6           27.9
## 20 11.1      14104710    10 control        21.4           39.9
## 21 11.2      14102560    11 case           21.3           31.9
## 22 10.3      14224520    11 control        21            37.6
## 23 12.1      14220350    12 case           22            27.3
## 24 13.1      14100770    12 control        22.3           39.1
## 25 13.2      14224670    13 case           21.6           26.7
## 26 13.3      14100390    13 control        22.6           37.3
## 27 14.3      14222790    14 case           23.9           31
## 28 14.2      14105140    14 control        23.7           43
## 29 16.1      14102780    15 case           24            33.7
## 30 17.3      14100120    15 control        24.6           39.6
## 31 17.2      14105630    16 case           23.9           31.3
## 32 14.1      14100400    16 control        23.4           39.6
```

## Case-Control with Gestational Age Matching

```
## 33 18.3      14222340      17 case      25.4      27.6
## 34 18.1      14104350      17 control    25.7      38.4
## 35 19.1      14103660      18 case      26.1      29.1
## 36 19.3      14102370      18 control    26.1      41
## 37 20.2      14100230      19 case      26.3      26.7
## 38 19.2      14225270      19 control    26.3      39
## 39 21.3      14106020      20 case      28.6      31.7
## 40 21.2      14220100      20 control    28.4      39
write_csv(sample_table,path = paste0("sample_table_matched_",params$treatment,".csv"))
ggplot(sample_table, aes(as.factor(pair), gestage_pbmc_collected,
                        color = ptb_case)) +
  geom_jitter(position=position_dodge(width = 0.5),size = 2) +
  xlab("matched pair id")
```

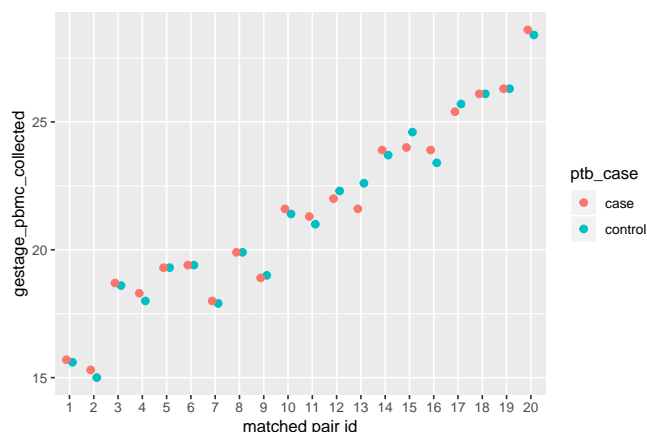

Then load Affymetrix CEL files. At this stage, Bioconductor will automatically download the necessary annotation packages and install them for us.

```
pd = as(as.data.frame(sample_table), "AnnotatedDataFrame")
rawData = read.celfiles(sample_table$file_name,
                        phenoData = pd,
                        sampleNames = sample_table$sample_id)
## Loading required package: pd.hta.2.0
## Loading required package: RSQLite
## Loading required package: DBI
## Platform design info loaded.
## Reading in : Nicholas Bayless_US 1.2_(HTA-2_0).CEL
## Reading in : Nicholas Bayless_US 2.1_(HTA-2_0).CEL
## Reading in : Nicholas Bayless_US 2.3_(HTA-2_0).CEL
## Reading in : Nicholas Bayless_US 2.2_(HTA-2_0).CEL
## Reading in : Nicholas Bayless_US 3.3_(HTA-2_0).CEL
## Reading in : Nicholas Bayless_US 3.2_(HTA-2_0).CEL
## Reading in : Nicholas Bayless_US 3.1_(HTA-2_0).CEL
## Reading in : Nicholas Bayless_US 4.2_(HTA-2_0).CEL
## Reading in : Nicholas Bayless_US 4.3_(HTA-2_0).CEL
## Reading in : Nicholas Bayless_US 5.3_(HTA-2_0).CEL
## Reading in : Nicholas Bayless_US 5.2_(HTA-2_0).CEL
## Reading in : Nicholas Bayless_US 6.1_(HTA-2_0).CEL
```

## Case-Control with Gestational Age Matching

```
## Reading in : Nicholas Bayless_US 6.3_(HTA-2_0).CEL
## Reading in : Nicholas Bayless_7.2 _-(HTA-2_0).CEL
## Reading in : Nicholas Bayless_8.3 _-(HTA-2_0).CEL
## Reading in : Nicholas Bayless_8.1 _-(HTA-2_0).CEL
## Reading in : Nicholas Bayless_9.2 _-(HTA-2_0).CEL
## Reading in : Nicholas Bayless_9.1 _-(HTA-2_0).CEL
## Reading in : Nicholas Bayless_10.1 _-(HTA-2_0).CEL
## Reading in : Nicholas Bayless_10.3 _-(HTA-2_0).CEL
## Reading in : Nicholas Bayless_11.2 _-(HTA-2_0).CEL
## Reading in : Nicholas Bayless_11.1 _-(HTA-2_0).CEL
## Reading in : Nicholas Bayless_12.1 _-(HTA-2_0).CEL
## Reading in : Nicholas Bayless_US 13.2_(HTA-2_0).CEL
## Reading in : Nicholas Bayless_US 13.1_(HTA-2_0).CEL
## Reading in : Nicholas Bayless_US 13.3_(HTA-2_0).CEL
## Reading in : Nicholas Bayless_US 14.3_(HTA-2_0).CEL
## Reading in : Nicholas Bayless_US 14.2_(HTA-2_0).CEL
## Reading in : Nicholas Bayless_US 14.1_(HTA-2_0).CEL
## Reading in : Nicholas Bayless_US 16.1_(HTA-2_0).CEL
## Reading in : Nicholas Bayless_US 17.2_(HTA-2_0).CEL
## Reading in : Nicholas Bayless_US 17.3_(HTA-2_0).CEL
## Reading in : Nicholas Bayless_US 18.3_(HTA-2_0).CEL
## Reading in : Nicholas Bayless_US 18.1_(HTA-2_0).CEL
## Reading in : Nicholas Bayless_US 19.1_(HTA-2_0).CEL
## Reading in : Nicholas Bayless_US 19.3_(HTA-2_0).CEL
## Reading in : Nicholas Bayless_US 19.2_(HTA-2_0).CEL
## Reading in : Nicholas Bayless_US 20.2_(HTA-2_0).CEL
## Reading in : Nicholas Bayless_US 21.3_(HTA-2_0).CEL
## Reading in : Nicholas Bayless_US 21.2_(HTA-2_0).CEL
## Warning in read.celfiles(sample_table$file_name, phenoData = pd, sampleNames
## = sample_table$sample_id): 'channel' automatically added to varMetadata in
## phenoData.
rawData
## HTAFeatureSet (storageMode: lockedEnvironment)
## assayData: 6892960 features, 40 samples
## element names: exprs
## protocolData
## rowNames: 1 2 ... 40 (40 total)
## varLabels: exprs dates
## varMetadata: labelDescription channel
## phenoData
## rowNames: 1 2 ... 40 (40 total)
## varLabels: ptidno ptb_case ... pair (7 total)
## varMetadata: labelDescription channel
## featureData: none
## experimentData: use 'experimentData(object)'
## Annotation: pd.hta.2.0
```

## 4 Quality Control

MA plots on the first three samples.

## Case-Control with Gestational Age Matching

```
MAplot(rawData[, 1:3], pairs=TRUE)
```

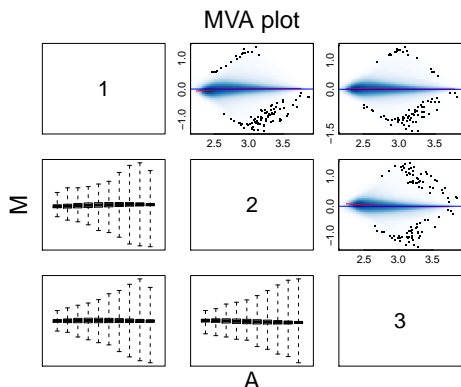

## 5 Preprocessing

Background subtraction, normalization and summarization using median-polish.

```
eset = rma(rawData)
## Background correcting
## Normalizing
## Calculating Expression
```

Get rid of background probes and annotate using functions in `affycoretools` package.

```
dbGetQuery(db(pd.hta.2.0), "select * from type_dict;")
##   type                                     type_id
## 1     1                                           main
## 2     2      Antigenomic background control
## 3     3      control->affx->bac_spike
## 4     4      control->affx->polya_spike
## 5     5 ERCC (External RNA Controls Consortium) step control
## 6     6      Exonic normalization control (Positive Control)
## 7     7      Intronic normalization control (Negative Control)
## 8     8                                           Positive Control
table(getMainProbes("pd.hta.2.0")$type)
##
##      1      2      3      4      5      6      7
## 67516    23      4      4    155    698    646
eset = getMainProbes(eset)
```

Filter probes that we cannot map to symbols.

```
e2s = toTable(hta20transcriptclusterSYMBOL)
prob_ids = rownames(exprs(eset))
keep_ids = which(prob_ids %in% e2s$probe_id)
eset = ExpressionSet(assayData = exprs(eset)[keep_ids,],
                    phenoData = phenoData(eset),
                    experimentData = experimentData(eset),
                    annotation = annotation(eset))
```



## Case-Control with Gestational Age Matching

Save to file.

```
class(eset)
## [1] "ExpressionSet"
## attr(,"package")
## [1] "Biobase"
show(eset)
## ExpressionSet (storageMode: lockedEnvironment)
## assayData: 29503 features, 40 samples
## element names: exprs
## protocolData: none
## phenoData
##  sampleNames: 1 2 ... 40 (40 total)
##  varLabels: ptidno ptb_case ... pair (7 total)
##  varMetadata: labelDescription channel
## featureData: none
## experimentData: use 'experimentData(object)'
## Annotation: pd.hta.2.0
exprs(eset)[1:10, 1:2]
##           1      2
## TC01000003.hg.1  2.124867  2.271436
## TC01000007.hg.1 11.059400 10.764831
## TC01000010.hg.1  3.202259  2.941917
## TC01000018.hg.1  6.939298  7.623561
## TC01000019.hg.1  5.839381  5.748863
## TC01000020.hg.1  5.660097  5.819165
## TC01000021.hg.1  5.654589  5.693005
## TC01000022.hg.1  5.674174  5.616228
## TC01000023.hg.1  6.026052  6.319220
## TC01000024.hg.1  5.800042  5.859162
save(eset, file = "eset.Rdata")
```

Write processed expressions to file for GEO upload.

```
geo_exprs_rma = exprs(eset)
condition = ifelse(pData(eset)$ptb_case == "control",
                  yes = "Term", no = "Preterm")
sample_name = paste0(pData(eset)$sample_id, "_",
                    condition, "_",
                    ifelse(params$treatment == "stim",
                          yes = "H1N1", "Mock"))
colnames(geo_exprs_rma) = sample_name
geo_exprs_rma %<>% as_tibble(rownames = "ID_REF")
write_csv(geo_exprs_rma, path = paste0("case_control_rma_", params$treatment, ".csv"))
```

## 6 Data Exploration

PCA plot of normalized expressions.

```
res_pca = prcomp(t(exprs(eset)), scale. = FALSE)
screepplot(res_pca)
```

## Case-Control with Gestational Age Matching

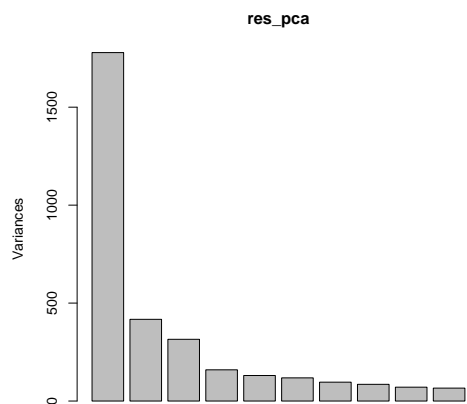

```
sample_table_annotated = eset@phenoData@data
sample_table_annotated$pair %<>% as.factor
asp_ratio = res_pca$sdev[2]^2/res_pca$sdev[1]^2
autoplot(res_pca,
  data = sample_table_annotated,
  shape = "ptb_case",
  colour = "gestage_pbmc_collected",
  size = 3,
  asp = asp_ratio)
```

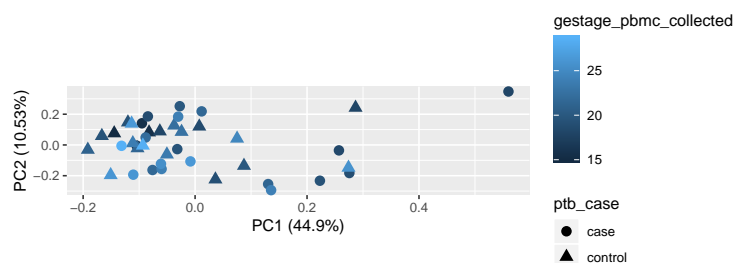

```
autoplot(res_pca,
  data = sample_table_annotated,
  shape = "ptb_case",
  colour = "gestage_delivery",
  size = 3,
  asp = asp_ratio)
```

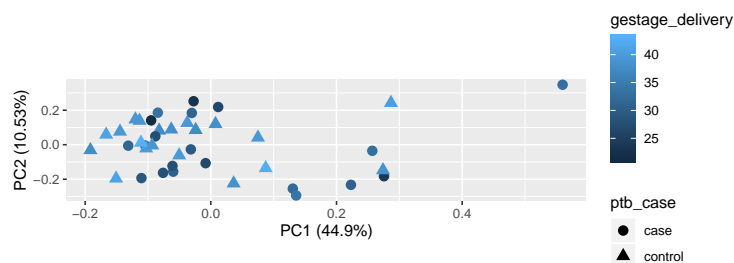

```
rownames(sample_table_annotated) = paste0(sample_table_annotated$pair,
  "_",
  sample_table_annotated$sample_id)
autoplot(res_pca,
```

## Case-Control with Gestational Age Matching

```
data = sample_table_annotated,  
shape = "ptb_case",  
colour = "pair",  
size = 3,  
label = TRUE,  
asp = asp_ratio)
```

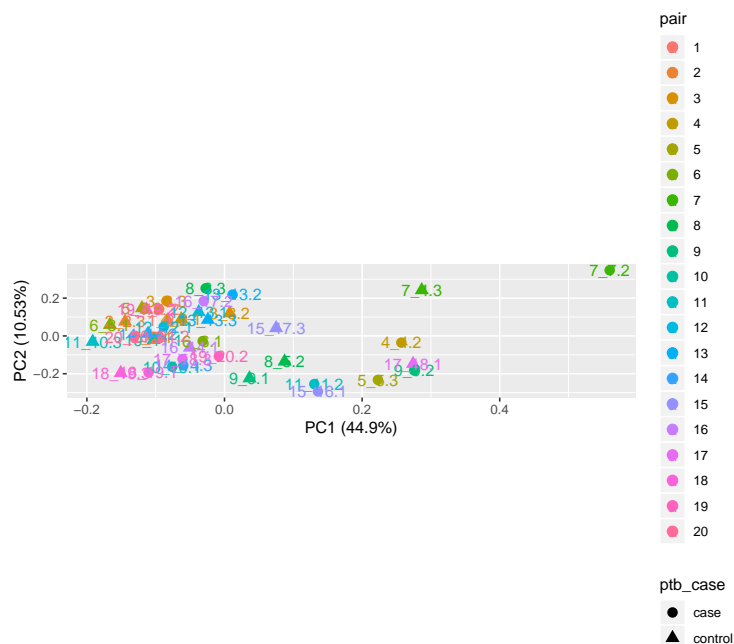

## 7 Differential Expression Analyses

Use `limma` for linear models to assess difference in expression. Paired analysis as described in Section 9.4.1 on page 42 in the [limma vignette](#).

Automatic independent filtering as described in [DESeq2 doc](#):

1. Filter genes based on mean expression
2. Fit linear model
3. Compute moderated  $t$ -tests
4. Count number of rejections at FDR of 10%

Pick the threshold that maximizes the number of discoveries.

```
mean_expr = rowMeans(exprs(eset))  
thres_candidates = seq(min(mean_expr), quantile(mean_expr, probs = 0.95), 1)  
fit_list = lapply(thres_candidates, function(thres) {  
  cat("Automatic independent filtering: thres = ", thres, "\n")  
  # threshold  
  eset_thres = ExpressionSet(assayData = exprs(eset)[mean_expr >= thres,],  
                             phenoData = phenoData(eset),  
                             experimentData = experimentData(eset),  
                             annotation = annotation(eset))  
})
```

## Case-Control with Gestational Age Matching

```
# fit model
targets = eset@phenoData@data
pair = factor(targets$pair)
treat = factor(targets$ptb_case, levels = c("control", "case"))
design = model.matrix(~ pair + treat)
fit = lmFit(eset_thres, design)
eBayes(fit)
})
## Automatic independent filtering: thres = 1.415861
## Automatic independent filtering: thres = 2.415861
## Automatic independent filtering: thres = 3.415861
## Automatic independent filtering: thres = 4.415861
## Automatic independent filtering: thres = 5.415861
## Automatic independent filtering: thres = 6.415861
num_sig = sapply(fit_list, function(fit) {
  gene_table = topTable(fit, coef = "treatcase", adjust = "BH",
                        number = nrow(fit))
  gene_table %<>% dplyr::filter(adj.P.Val < 0.1)
  nrow(gene_table)
})
num_sig
## [1] 0 0 0 0 0 0
fit = fit_list[[which.max(num_sig)]]
```

The `topTable` command provides us a way of ranking genes for further evaluation. In the case below, we adjust for multiple testing by FDR.

```
gene_table = topTable(fit, coef = "treatcase", adjust = "BH",
                      number = nrow(fit))
hist(gene_table$P.Value, breaks = 20)
```

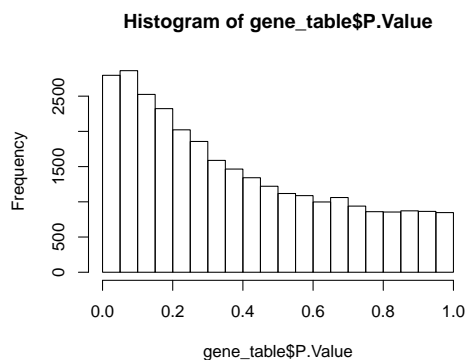

```
sum(gene_table$adj.P.Val < 0.1)
## [1] 0
```

Volcano plots for quality control.

### Case-Control with Gestational Age Matching

```
volcanoplot(fit, coef = "treatcase", highlight = 10)
```

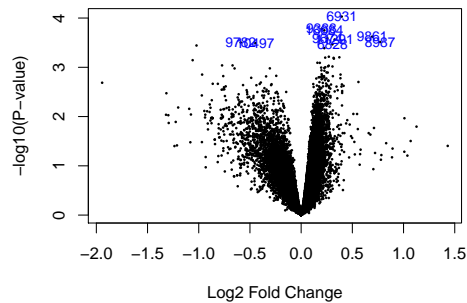

Map between manufacturer identifiers and gene symbols.

```
map_gene_symbol = function(gene_table) {
  prob_ids = rownames(gene_table)
  symbol = sapply(prob_ids,function(prob_id) {
    matching_symbol = e2s$symbol[prob_id==e2s$probe_id]
    if(length(matching_symbol)==0) matching_symbol = "No_Symbol_Found"
    matching_symbol
  }) %>% unlist
  gene_table = cbind(gene_table,symbol=symbol,stringsAsFactors=FALSE)
  gene_table
}

gene_table = map_gene_symbol(gene_table)
print(head(gene_table, n = 10))
```

| ## |                 | logFC      | AveExpr     | t         | P.Value      | adj.P.Val |
|----|-----------------|------------|-------------|-----------|--------------|-----------|
| ## | TC04001942.hg.1 | 0.3964871  | 3.316441    | 4.736341  | 9.335941e-05 | 0.5114967 |
| ## | TC06002060.hg.1 | 0.2001396  | 2.642368    | 4.506959  | 1.646325e-04 | 0.5114967 |
| ## | TC11000211.hg.1 | 0.2261746  | 5.190697    | 4.475880  | 1.777978e-04 | 0.5114967 |
| ## | TC06003369.hg.1 | 0.6938335  | 6.947984    | 4.356977  | 2.386576e-04 | 0.5114967 |
| ## | TC06002625.hg.1 | 0.2560004  | 3.762744    | 4.326441  | 2.573996e-04 | 0.5114967 |
| ## | TC07002768.hg.1 | 0.3270357  | 5.441849    | 4.302524  | 2.730997e-04 | 0.5114967 |
| ## | TC06001226.hg.1 | 0.7722665  | 6.874004    | 4.255594  | 3.067389e-04 | 0.5114967 |
| ## | TC06003141.hg.1 | -0.5904733 | 4.303887    | -4.246605 | 3.136386e-04 | 0.5114967 |
| ## | TC07000793.hg.1 | -0.4470670 | 6.128909    | -4.235625 | 3.222778e-04 | 0.5114967 |
| ## | TC04001652.hg.1 | 0.3054274  | 4.363445    | 4.212081  | 3.416088e-04 | 0.5114967 |
| ## |                 | B          | symbol      |           |              |           |
| ## | TC04001942.hg.1 | -0.2228733 | SEPSECS-AS1 |           |              |           |
| ## | TC06002060.hg.1 | -0.5255553 | FAM184A     |           |              |           |
| ## | TC11000211.hg.1 | -0.5670429 | SPON1       |           |              |           |
| ## | TC06003369.hg.1 | -0.7267408 | TUBB2B      |           |              |           |
| ## | TC06002625.hg.1 | -0.7679904 | ALDH5A1     |           |              |           |
| ## | TC07002768.hg.1 | -0.8003627 | ZNF890P     |           |              |           |
| ## | TC06001226.hg.1 | -0.8640440 | TUBB2A      |           |              |           |
| ## | TC06003141.hg.1 | -0.8762644 | TIAM2       |           |              |           |
| ## | TC07000793.hg.1 | -0.8912032 | TSPAN33     |           |              |           |
| ## | TC04001652.hg.1 | -0.9232694 | LOC729870   |           |              |           |

Write to text file.

## Case-Control with Gestational Age Matching

```
file_name_processed = paste0("case_control_", params$treatment, ".csv")
file_name_processed
## [1] "case_control_unstim.csv"
write_csv(gene_table, path = file_name_processed)
```

Add gene names to standard volcano plot.

```
logfc_thres = 1 # logFC threshold
pvalue_thres = 3.5 # -log10 of unadjusted p-value
gene_table %<>% mutate(
  show = ifelse(abs(logFC) > logfc_thres | pvalue_thres < -log10(P.Value),
    "yes", "no")
)
gvolcano = ggplot(gene_table, aes(logFC, -log10(P.Value), color = show)) +
  geom_point() +
  geom_vline(xintercept = c(-logfc_thres, logfc_thres), linetype = 2) +
  geom_hline(yintercept = pvalue_thres, linetype = 2) +
  geom_text_repel(
    data = dplyr::filter(gene_table, show == "yes"),
    aes(label = symbol),
    size = 5,
    box.padding = unit(0.35, "lines"),
    point.padding = unit(0.3, "lines")
  ) +
  xlab("log2 fold change (up-regulated in preterm -->)" +
  ylab("-log10 p-value" +
  theme(legend.position = "none") +
  scale_colour_manual(values = c("gray", "black")) +
  ggtitle(ifelse(params$treatment == "unstim",
    "Unstimulated Samples",
    "Stimulated Samples"))

gvolcano
```

## Case-Control with Gestational Age Matching

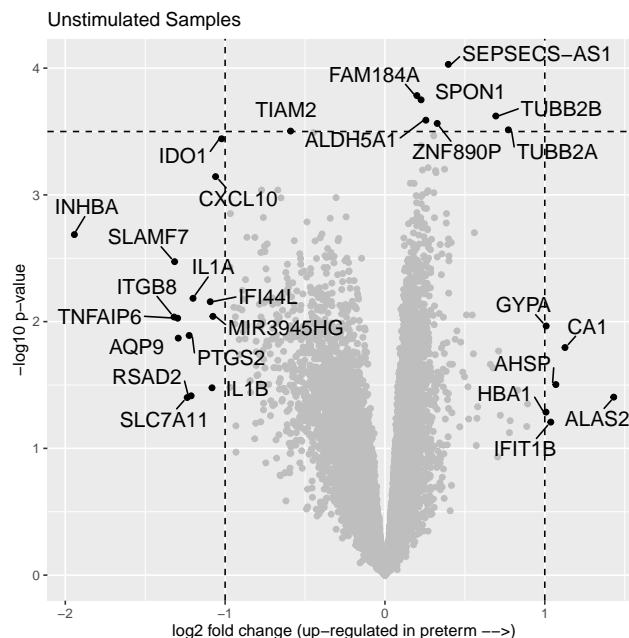

```
save(gvolcano, file = paste0("gvolcano_", params$treatment, ".Rdata"))
```

## 8 Patient Variability

Visualize the pair-to-pair variability.

```
# prepare tables
targets = eset@phenoData@data
targets %<>% mutate(id = 1:nrow(targets))
GA_affy = read_csv("GA_affy.csv")
## Parsed with column specification:
## cols(
##   `Sample name` = col_character(),
##   title = col_character(),
##   `CEL file` = col_character(),
##   `source name` = col_character(),
##   organism = col_character(),
##   `characteristics: condition` = col_character(),
##   `characteristics: treatment` = col_character(),
##   `characteristics: rin` = col_double(),
##   `characteristics: run_day` = col_datetime(format = ""),
##   `characteristics: run_batch` = col_double(),
##   `characteristics: viable_cell_count` = col_double(),
##   `characteristics: viability` = col_double(),
##   `characteristics: ptidno` = col_double(),
##   `characteristics: gestage_delivery` = col_double(),
##   `characteristics: gestage_enroll` = col_double(),
##   molecule = col_character(),
##   label = col_character(),
##   description = col_logical(),
```

## Case-Control with Gestational Age Matching

```
## `chip name or GEO platform id` = col_character()
## )
GA_affy %>% dplyr::filter(
  `characteristics: treatment` ==
    ifelse(params$treatment == "stim", yes = "H1N1", "Mock")
)
GA_affy %>% dplyr::rename(ptidno = `characteristics: ptidno`)
targets %>% left_join(GA_affy, by = "ptidno")
tb_case = targets[targets$ptb_case == "case", ]
tb_control = targets[targets$ptb_case == "control", ]
tb = left_join(tb_control, tb_case, by = "pair",
  suffix = c(".control", ".case"))

# take diff within pairs
tb_exrs = exprs(eset)
X = tb_exrs[,tb$id.control]
Y = tb_exrs[,tb$id.case]
D = Y - X

# implement my own paired t-test
t_stat = apply(D, MARGIN = 1,
  function(x) t.test(x)$statistic)
hist(t_stat, breaks = 100)
```

Histogram of t\_stat

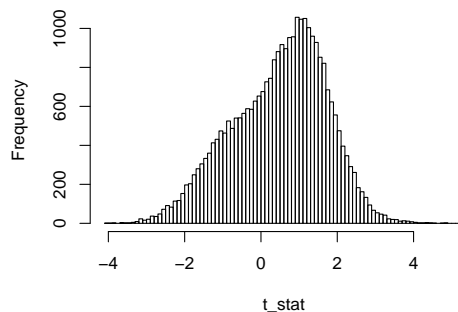

```
# plot
tb_D = D %>% as_tibble %>% mutate(gene_id = 1:nrow(D))
tb_D %>% gather(pair, value, -gene_id)
tb_D$pair %>% factor(levels = sort(unique(as.integer(tb_D$pair))))
ggplot(tb_D, aes(value, group = pair)) +
  geom_density() +
  xlim(c(-2, 2))
## Warning: Removed 2926 rows containing non-finite values (stat_density).
```



Case-Control with Gestational Age Matching

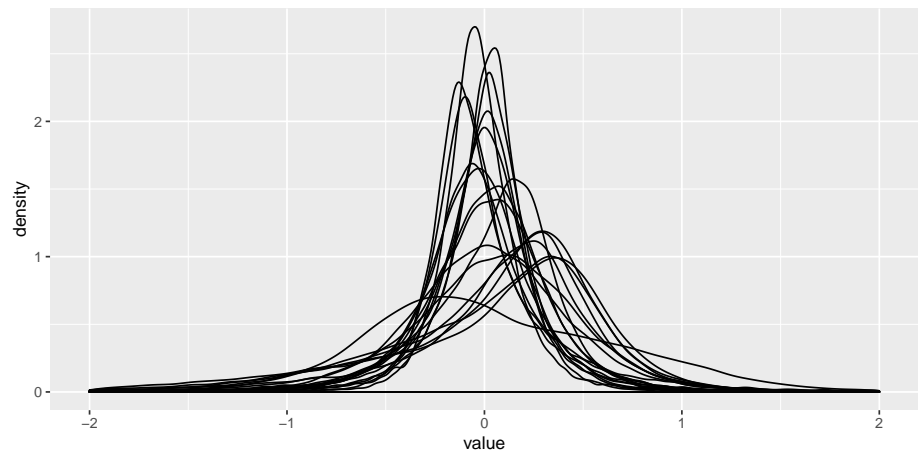

```
ggplot(tb_D, aes(value)) +
  geom_density() +
  facet_wrap(~pair) +
  xlim(c(-2, 2))
## Warning: Removed 2926 rows containing non-finite values (stat_density).
```

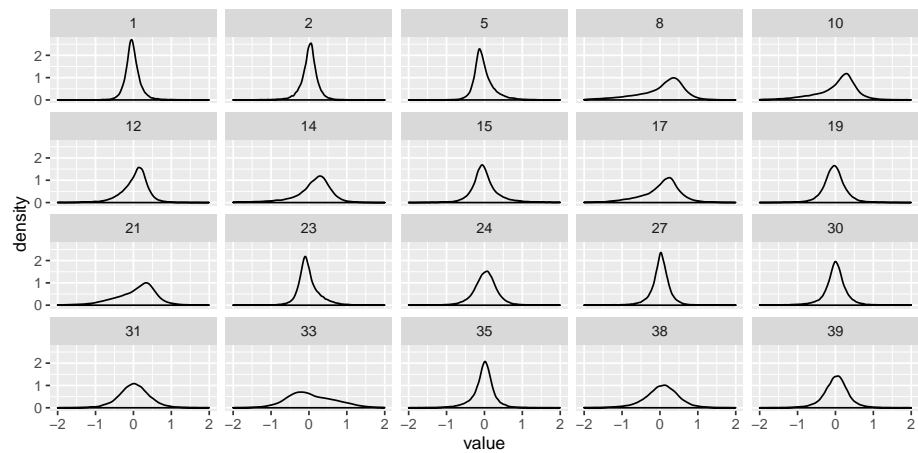

The variability does not seem to be related to `run_day` and `run_batch`.

```
table(targets$pair, targets$`characteristics: run_day`)
##
##      2019-02-11 2019-02-19 2019-02-24 2019-02-26 2019-03-01 2019-03-07
## 1           2           0           0           0           0           0
## 2           2           0           0           0           0           0
## 3           2           0           0           0           0           0
## 4           2           0           0           0           0           0
## 5           2           0           0           0           0           0
## 6           1           1           0           0           0           0
## 7           1           1           0           0           0           0
## 8           1           1           0           0           0           0
## 9           0           2           0           0           0           0
## 10          0           1           1           0           0           0
## 11          0           1           1           0           0           0
## 12          0           0           1           1           0           0
```

## Case-Control with Gestational Age Matching

```
## 13      0      0      0      2      0      0
## 14      0      0      0      2      0      0
## 15      0      0      0      0      2      0
## 16      0      0      0      1      1      0
## 17      0      0      0      0      0      2
## 18      0      0      0      0      0      2
## 19      0      0      0      0      0      2
## 20      0      0      0      0      0      2
table(targets$pair, targets$characteristics: run_batch`)
##
##      1 2 3
## 1 2 0 0
## 2 2 0 0
## 3 0 2 0
## 4 0 2 0
## 5 0 0 2
## 6 1 0 1
## 7 1 1 0
## 8 1 0 1
## 9 0 2 0
## 10 1 1 0
## 11 1 1 0
## 12 2 0 0
## 13 2 0 0
## 14 2 0 0
## 15 2 0 0
## 16 2 0 0
## 17 2 0 0
## 18 2 0 0
## 19 1 1 0
## 20 0 2 0
```

## 9 Power Analysis

Power analysis using local FDR methodology.

```
# fit model
targets = eset@phenoData@data
pair = factor(targets$pair)
treat = factor(targets$ptb_case, levels = c("control", "case"))
design = model.matrix(~ treat + pair)
fit = lmFit(eset, design)

# ordinary t-statistic
t_stat = fit$coef[, "treatcase"] / fit$stdev.unscaled[, "treatcase"] / fit$sigma
z_stat = qnorm(pt(t_stat, df = ncol(exprs(eset))-2))
hist(t_stat, breaks = 100)
```

## Case-Control with Gestational Age Matching

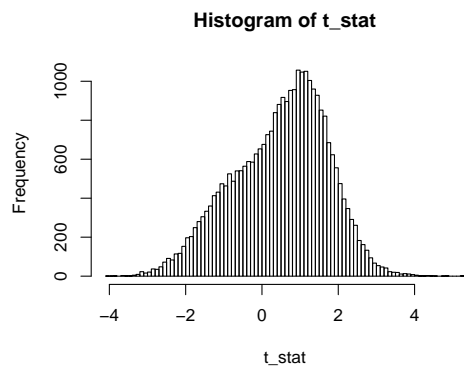

```
hist(z_stat, breaks = 100)
```

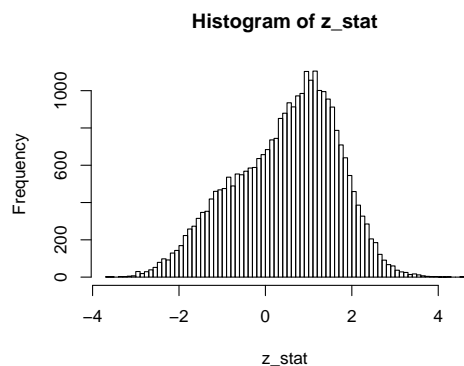

```
locfdr_res = locfdr(z_stat, df = 7, plot = 4)
```

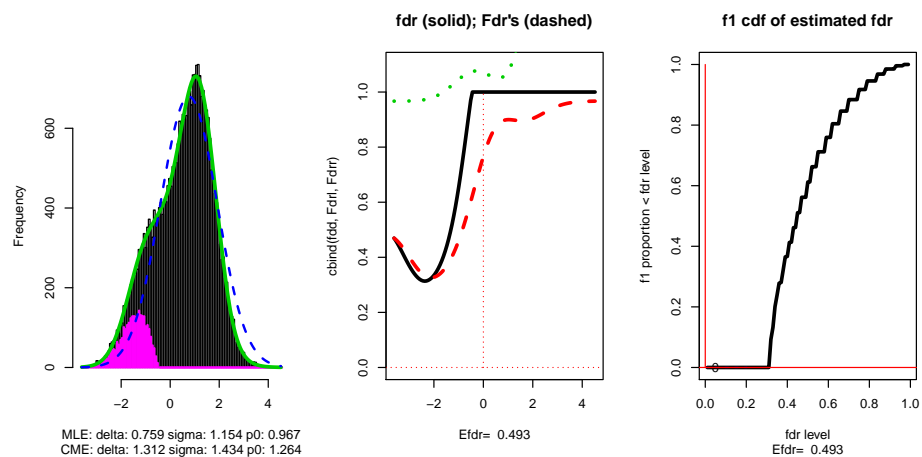

```
locfdr_res$Efdr
##      Efdr      Eleftr      Erightr      Efdrtheo      Eleftr0      Erightr0
## 0.4926096 0.4926096 1.0000000 0.3135995 0.8643666 0.2658268
locfdr_res = locfdr(z_stat, df = 7, plot = 1)
```

## Case-Control with Gestational Age Matching

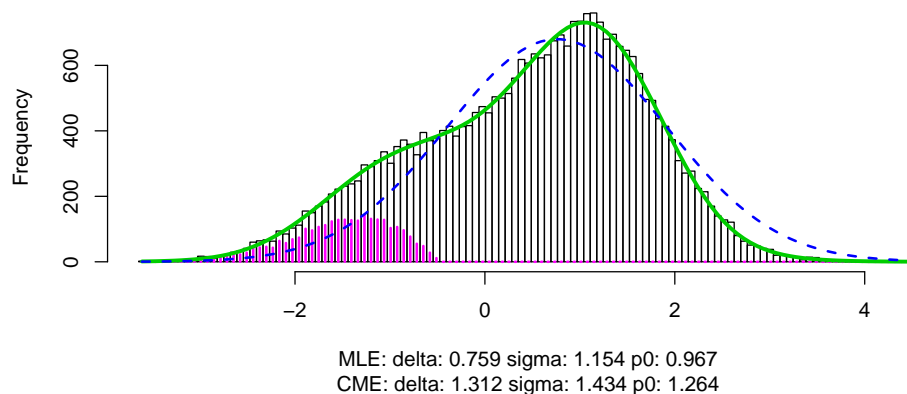

Large values  $E_{fdr} > 0.4$  indicate low power (according to Section 3 of “Size, power and false discovery rates”, Efron 2007).

## 10 Gene Set Enrichment Analysis

Standard KEGG analysis.

```
fit %<>% eBayes
pathway_results = keggga(fit, species.KEGG = "hsa")
## No DE genes
topKEGG(pathway_results)
## data frame with 0 columns and 0 rows
```

## Session Info

```
sessionInfo()
## R version 3.5.1 (2018-07-02)
## Platform: x86_64-apple-darwin15.6.0 (64-bit)
## Running under: macOS 10.15.3
##
## Matrix products: default
## BLAS: /Library/Frameworks/R.framework/Versions/3.5/Resources/lib/libRblas.0.dylib
## LAPACK: /Library/Frameworks/R.framework/Versions/3.5/Resources/lib/libRlapack.dylib
##
## locale:
## [1] en_US.UTF-8/en_US.UTF-8/en_US.UTF-8/C/en_US.UTF-8/en_US.UTF-8
##
## attached base packages:
## [1] stats4    parallel  stats     graphics  grDevices  utils      datasets
## [8] methods   base
##
## other attached packages:
## [1] pd.hta.2.0_3.12.2      DBI_1.0.0
## [3] RSQLite_2.1.1          locfdr_1.1-8
```

## Case-Control with Gestational Age Matching

```
## [5] tidyr_1.0.0          ggrepel_0.8.1
## [7] tibble_2.1.3         stringr_1.4.0
## [9] readxl_1.3.1         dplyr_0.8.3
## [11] readr_1.3.1          statmod_1.4.32
## [13] magrittr_1.5         ggfortify_0.4.7
## [15] ggplot2_3.2.1        MatchIt_3.0.2
## [17] genefilter_1.64.0     affycoretools_1.54.0
## [19] hta20transcriptcluster.db_8.7.0 org.Hs.eg.db_3.7.0
## [21] AnnotationDbi_1.44.0 limma_3.38.3
## [23] oligo_1.46.0         Biostrings_2.50.2
## [25] XVector_0.22.0       IRanges_2.16.0
## [27] S4Vectors_0.20.1     Biobase_2.42.0
## [29] oligoClasses_1.44.0  BiocGenerics_0.28.0
## [31] BiocStyle_2.10.0
##
## loaded via a namespace (and not attached):
## [1] utf8_1.1.4          R.utils_2.8.0
## [3] tidyselect_0.2.5    htmlwidgets_1.3
## [5] grid_3.5.1          BiocParallel_1.16.6
## [7] munsell_0.5.0       codetools_0.2-16
## [9] preprocessCore_1.44.0 withr_2.1.2
## [11] colorspace_1.4-1    Category_2.48.1
## [13] OrganismDbi_1.24.0  knitr_1.22
## [15] rstudioapi_0.10     labeling_0.3
## [17] GenomeInfoDbData_1.2.0 hwriter_1.3.2
## [19] bit64_0.9-7         farver_2.0.1
## [21] vctrs_0.2.1         xfun_0.6
## [23] biovizBase_1.30.1   affxparser_1.54.0
## [25] R6_2.4.1            GenomeInfoDb_1.18.2
## [27] optmatch_0.9-11     locfit_1.5-9.1
## [29] AnnotationFilter_1.6.0 bitops_1.0-6
## [31] reshape_0.8.8       DelayedArray_0.8.0
## [33] assertthat_0.2.1    scales_1.1.0
## [35] nnet_7.3-12         gtable_0.3.0
## [37] affy_1.60.0         ggbio_1.30.0
## [39] svd_0.5             ensemblDb_2.6.8
## [41] rlang_0.4.2         zeallot_0.1.0
## [43] splines_3.5.1       rtracklayer_1.42.2
## [45] lazyeval_0.2.2      acepack_1.4.1
## [47] dichromat_2.0-0     checkmate_1.9.4
## [49] BiocManager_1.30.4  yaml_2.2.0
## [51] reshape2_1.4.3      abind_1.4-5
## [53] GenomicFeatures_1.34.8 backports_1.1.5
## [55] Hmisc_4.2-0         RBGL_1.58.2
## [57] tools_3.5.1         bookdown_0.9
## [59] ellipsis_0.3.0      affyio_1.52.0
## [61] gplots_3.0.1.1      ff_2.2-14
## [63] RColorBrewer_1.1-2  Rcpp_1.0.3
## [65] plyr_1.8.5          base64enc_0.1-3
## [67] progress_1.2.2      zlibbioc_1.28.0
## [69] purrr_0.3.3         RCurl_1.95-4.12
```

## Case-Control with Gestational Age Matching

```
## [71] prettyunits_1.1.0      rpart_4.1-15
## [73] SummarizedExperiment_1.12.0 cluster_2.0.9
## [75] data.table_1.12.6      SparseM_1.77
## [77] ProtGenerics_1.14.0    matrixStats_0.55.0
## [79] hms_0.5.2              evaluate_0.13
## [81] xtable_1.8-4           XML_3.98-1.19
## [83] gcrma_2.54.0           gridExtra_2.3
## [85] RITools_0.1-17         compiler_3.5.1
## [87] biomaRt_2.38.0         KernSmooth_2.23-15
## [89] crayon_1.3.4           ReportingTools_2.22.1
## [91] R.oo_1.22.0            htmltools_0.3.6
## [93] G0stats_2.48.0         Formula_1.2-3
## [95] geneplotter_1.60.0     MASS_7.3-51.4
## [97] Matrix_1.2-17          cli_2.0.1
## [99] R.methodsS3_1.7.1      gdata_2.18.0
## [101] GenomicRanges_1.34.0   pkgconfig_2.0.3
## [103] GenomicAlignments_1.18.1 foreign_0.8-71
## [105] foreach_1.4.4          annotate_1.60.1
## [107] AnnotationForge_1.24.0 VariantAnnotation_1.28.13
## [109] digest_0.6.23          graph_1.60.0
## [111] rmarkdown_1.12         cellranger_1.1.0
## [113] htmlTable_1.13.2       edgeR_3.24.3
## [115] GSEABase_1.44.0        curl_4.3
## [117] Rsamtools_1.34.1       gtools_3.8.1
## [119] lifecycle_0.1.0       PFAM.db_3.7.0
## [121] fansi_0.4.1            BSgenome_1.50.0
## [123] pillar_1.4.3           lattice_0.20-38
## [125] GGally_1.4.0           httr_1.4.0
## [127] survival_2.44-1.1      G0.db_3.7.0
## [129] glue_1.3.1             iterators_1.0.10
## [131] bit_1.1-14             Rgraphviz_2.26.0
## [133] stringi_1.4.5          blob_1.1.1
## [135] DESeq2_1.22.2          latticeExtra_0.6-28
## [137] caTools_1.17.1.2       memoise_1.1.0
```
